# Supplementary material for: Clinical Implications of Physical Function and Resilience in Patients Undergoing Transcatheter Aortic Valve Replacement
Source: PubMed Central journal article supplement — J Am Heart Assoc. 2020 Aug 28;9(17):e017075. doi: 10.1161/JAHA.120.017075 (PMC7660783; doi:10.1161/jaha.120.017075), 2020-08-28
Supplement: JAH3-9-e017075-s001.pdf [file JAH3-9-e017075-s001.pdf]

# **Supplemental Material**

**Table S1. Baseline and 30 Day Characteristics in Patients of the Analytic Cohort, Patients Unable to Complete the Walk Test at Baseline or 1 year, and Patients with Missing Walk Data.**

|                                                                         | Analytic Cohort<br>(n=576) | Patients Unable to<br>Complete the Walk<br>Test at Baseline<br>and/or 1 Year<br>(n=110) | Patients with<br>Missing Walk Test<br>Data at Baseline or<br>1 Year<br>(n=98) | p-value<br>(overall) |
|-------------------------------------------------------------------------|----------------------------|-----------------------------------------------------------------------------------------|-------------------------------------------------------------------------------|----------------------|
| <b>Baseline Clinical Characteristics</b>                                |                            |                                                                                         |                                                                               |                      |
| Age, mean (SD), years                                                   | 82 (7.4)                   | 82 (8.1)                                                                                | 84 (6.1)                                                                      | 0.17                 |
| Female sex                                                              | 48.1%                      | 58.2%                                                                                   | 49.0%                                                                         | 0.15                 |
| Body mass index, mean (SD), kg/m <sup>2</sup>                           | 29.0 (6.3)                 | 30.0 (8.0)                                                                              | 29.3 (8.7)                                                                    | 0.43                 |
| Extreme risk                                                            | 20.3%                      | 31.8%                                                                                   | 19.4%                                                                         | 0.02                 |
| Society of Thoracic Surgeons score, mean (SD)                           | 6.52 (3.84)                | 7.07 (3.97)                                                                             | 6.74 (3.93)                                                                   | 0.37                 |
| Orthopedic disease                                                      | 13.2%                      | 34.8%                                                                                   | 15.5%                                                                         | 0.049                |
| Frailty                                                                 | 68.9%                      | 76.8%                                                                                   | 76.1%                                                                         | 0.24                 |
| Gait speed, mean to walk 5 m (SD), seconds                              | 8.02 (4.08)                | 11.44 (7.63)                                                                            | 9.01 (4.97)                                                                   | <0.0001              |
| Maximal grip strength, mean (SD), kg                                    | 21.81 (9.86)               | 19.53 (10.04)                                                                           | 20.03 (11.17)                                                                 | 0.04                 |
| Katz Index Activities of Daily Living Score mean (SD)*                  | 5.71 (0.75)                | 5.21 (1.20)                                                                             | 5.44 (1.08)                                                                   | <0.0001              |
| Mini-Cognitive Assessment for Dementia Score (SD) †                     | 3.68 (1.37)                | 3.44 (1.27)                                                                             | 3.52 (1.43)                                                                   | 0.16                 |
| New York Heart Association Class III/IV                                 | 70.4%                      | 76.4%                                                                                   | 68.4%                                                                         | 0.02                 |
| Medically-treated diabetes mellitus                                     | 31.5%                      | 43.6%                                                                                   | 21.4%                                                                         | 0.003                |
| Currently taking immunosuppressive therapy                              | 8.7%                       | 8.2%                                                                                    | 14.3%                                                                         | 0.20                 |
| History of coronary artery disease                                      | 74.0%                      | 66.1%                                                                                   | 69.4%                                                                         | 0.19                 |
| History of myocardial infarction                                        | 18.5%                      | 22.9%                                                                                   | 18.6%                                                                         | 0.55                 |
| History of cerebrovascular accident                                     | 10.8%                      | 19.1%                                                                                   | 14.4%                                                                         | 0.05                 |
| History of peripheral vascular disease                                  | 31.7%                      | 25.7%                                                                                   | 20.4%                                                                         | 0.05                 |
| History of chronic obstructive pulmonary disease                        | 31.1%                      | 31.8%                                                                                   | 33.0%                                                                         | 0.93                 |
| Chronic obstructive pulmonary disease:<br>Supplemental oxygen dependent | 5.1%                       | 7.3%                                                                                    | 10.3%                                                                         | 0.12                 |
| History of atrial fibrillation                                          | 32.9%                      | 30.0%                                                                                   | 37.8%                                                                         | 0.48                 |
| Prior pacemaker implant                                                 | 17.9%                      | 12.7%                                                                                   | 22.4%                                                                         | 0.18                 |
| <b>Baseline Echocardiography</b>                                        |                            |                                                                                         |                                                                               |                      |
| Aortic-valve area, mean (SD), cm <sup>2</sup>                           | 0.70 (0.19)                | 0.66 (0.20)                                                                             | 0.67 (0.19)                                                                   | 0.16                 |
| Mean aortic-valve gradient, mean (SD), mm Hg                            | 44.55 (12.87)              | 45.25 (17.05)                                                                           | 44.50 (10.44)                                                                 | 0.88                 |
| Left ventricular ejection fraction (SD)                                 | 56.30 (11.58)              | 57.02 (10.09)                                                                           | 54.14 (12.01)                                                                 | 0.23                 |
| Moderate or greater aortic regurgitation                                | 6.5%                       | 7.0%                                                                                    | 7.6%                                                                          | 0.98                 |
| Moderate or greater mitral regurgitation                                | 9.2%                       | 11.2%                                                                                   | 10.0%                                                                         | 0.78                 |

|                                                                                     | Analytic Cohort<br>(n=576) | Patients Unable to<br>Complete the Walk<br>Test at Baseline<br>and/or 1 Year<br>(n=110) | Patients with<br>Missing Walk Test<br>Data at Baseline or<br>1 Year<br>(n=98) | p-value<br>(overall) |
|-------------------------------------------------------------------------------------|----------------------------|-----------------------------------------------------------------------------------------|-------------------------------------------------------------------------------|----------------------|
| <b>30-day Echocardiography</b>                                                      |                            |                                                                                         |                                                                               |                      |
| Effective orifice area, mean (SD), cm <sup>2</sup>                                  | 1.71 (0.51)                | 1.71 (0.50)                                                                             | 1.74 (0.47)                                                                   | 0.91                 |
| Mean aortic-valve gradient, mean (SD), mm Hg                                        | 10.60 (6.04)               | 10.44 (5.76)                                                                            | 10.63 (5.38)                                                                  | 0.97                 |
| Left ventricular ejection fraction (SD)                                             | 54.61 (11.00)              | 55.22 (11.33)                                                                           | 52.60 (11.11)                                                                 | 0.31                 |
| Moderate or greater aortic regurgitation                                            | 13.4%                      | 11.2%                                                                                   | 12.7%                                                                         | 0.82                 |
| <b>30-day Clinical findings</b>                                                     |                            |                                                                                         |                                                                               |                      |
| NYHA III/IV                                                                         | 8.2%                       | 9.7%                                                                                    | 18.6%                                                                         | 0.03                 |
| Major vascular complications                                                        | 4.2%                       | 5.5%                                                                                    | 12.2%                                                                         | <0.0001              |
| Bleeding (life-threatening or disabling)                                            | 5.7%                       | 4.5%                                                                                    | 10.2%                                                                         | 0.15                 |
| Hospitalization for valve-related symptoms or<br>worsening congestive heart failure | 2.1%                       | 3.6%                                                                                    | 4.1%                                                                          | 0.23                 |
| New pacemaker                                                                       | 31.6%                      | 26.4%                                                                                   | 18.4%                                                                         | 0.04                 |
| New onset atrial fibrillation or flutter                                            | 6.1%                       | 7.3%                                                                                    | 2.0%                                                                          | 0.22                 |

Values are mean (SD) (n) or n (%) in the implanted patient population. \*scores independence in performance of bathing, dressing, toileting, transferring, continence, and feeding (1 point each); a score of 6 indicates full function,  $\leq 2$  indicates severe functional impairment. †a score to differentiate patients with dementia based on a clock drawing distractor test (0-2 points) and recall of words (0-3 points); scores above 3 (out of 5) are considered negative for dementia.

**Table S2. Gait speed at baseline and 1 year.**

|                                  | <b>Baseline<br/>Gait Speed<br/>(n=576)</b> | <b>1-year<br/>Gait Speed<br/>(n=576)</b> |
|----------------------------------|--------------------------------------------|------------------------------------------|
| Mean (m/s)                       | 0.72                                       | 0.77                                     |
| Stdev (m/s)                      | 0.26                                       | 0.27                                     |
| 2.5 percentile (m/s)             | 0.25                                       | 0.32                                     |
| 10 percentile (m/s)              | 0.45                                       | 0.45                                     |
| 25 percentile (m/s)              | 0.56                                       | 0.56                                     |
| Median (m/s)                     | 0.71                                       | 0.71                                     |
| 75 percentile (m/s)              | 0.83                                       | 1.00                                     |
| 90 percentile (m/s)              | 1.00                                       | 1.25                                     |
| 97.5 percentile (m/s)            | 1.25                                       | 1.25                                     |
|                                  |                                            |                                          |
|                                  | Out of 576                                 | Out of 576                               |
| n Fast walker ( $\geq 0.83$ m/s) | 209                                        | 264                                      |
| n Slow walker ( $< 0.83$ m/s)    | 367                                        | 312                                      |
| % fast walker                    | 36.3%                                      | 45.8%                                    |
| % slow walker                    | 63.7%                                      | 54.2%                                    |

Gait speed was calculated in meters/second based on the 5-meter walk time. Slow walker was defined as those with a gait speed  $< 0.83$  m/s, and normal walker was defined as a gait speed  $\geq 0.83$  m/s.

**Table S3. Magnitude and Direction of Change in Gait Speed Between Baseline and 1 Year.**

|                                                         | All patients<br>(n=576) |      | Slow Walkers<br>at Baseline<br>(n=367) |      | Normal Walkers<br>at Baseline<br>(n=209) |      |
|---------------------------------------------------------|-------------------------|------|----------------------------------------|------|------------------------------------------|------|
|                                                         | n                       | %    | n                                      | %    | n                                        | %    |
| <b>Change in gait speed from<br/>baseline to 1 year</b> |                         |      |                                        |      |                                          |      |
| Improve $\geq 0.30$ m/s                                 | 80                      | 13.9 | 65                                     | 17.7 | 15                                       | 7.2  |
| Improve $\geq 0.20$ - $< 0.30$ m/s                      | 74                      | 12.8 | 59                                     | 16.1 | 15                                       | 7.2  |
| Improve $\geq 0.10$ - $< 0.20$ m/s                      | 71                      | 12.3 | 49                                     | 13.4 | 22                                       | 10.5 |
| No change $\pm 0.1$ m/s                                 | 202                     | 35.1 | 141                                    | 38.4 | 61                                       | 29.2 |
| Decline $\geq 0.10$ - $< 0.20$ m/s                      | 60                      | 10.4 | 29                                     | 7.9  | 31                                       | 14.8 |
| Decline $\geq 0.20$ - $< 0.30$ m/s                      | 47                      | 8.2  | 20                                     | 5.4  | 27                                       | 12.9 |
| Decline $\geq 0.30$ m/s                                 | 42                      | 7.3  | 4                                      | 1.1  | 38                                       | 18.2 |

**Table S4. Baseline Predictors of 1 Year Gait Speed.**

|                                                       | Univariable                  |         | Multivariable                |         |
|-------------------------------------------------------|------------------------------|---------|------------------------------|---------|
|                                                       | $\beta$ estimate<br>(95% CI) | p-value | $\beta$ estimate<br>(95% CI) | p-value |
| <b>Clinical factors (baseline)</b>                    |                              |         |                              |         |
| Gait speed at baseline (per 0.1 m/s increase)         | 0.49 (0.41, 0.56)            | <0.001  | 0.38 (0.29, 0.46)            | <0.001  |
| Max grip strength (per 1 kg increase)                 | 0.09 (0.07, 0.11)            | <0.001  | 0.03 (0.01, 0.05)            | 0.01    |
| Female sex                                            | -1.47 (-1.90, -1.04)         | <0.001  |                              |         |
| STS score (per increase of 1)                         | -0.17 (-0.23, -0.12)         | <0.001  | -0.09 (-0.14, -0.03)         | 0.001   |
| Katz ADLs (per 1 increase)                            | 0.78 (0.49, 1.06)            | <0.001  | 0.26 (-0.01, 0.52)           | 0.06    |
| NYHA III/IV at baseline                               | -1.18 (-1.65, -0.71)         | <0.001  | -0.51 (-0.93, -0.10)         | 0.02    |
| Orthopedic disease                                    | -1.47 (-2.14, -0.81)         | <0.001  | -0.91 (-1.51, -0.32)         | 0.003   |
| Age (per 1-year increase)                             | -0.06 (-0.09, -0.03)         | <0.001  |                              |         |
| History of Coronary disease                           | 0.85 (0.35, 1.35)            | 0.001   | 0.49 (0.05, 0.93)            | 0.03    |
| History of COPD                                       | -0.77 (-1.25, -0.28)         | 0.002   | -0.40 (-0.82, 0.01)          | 0.06    |
| Mini-COG (per 1-point increase)                       | 0.21 (0.05, 0.37)            | 0.01    | 0.14 (0.00, 0.28)            | 0.05    |
| History of Afib or flutter                            | -0.44 (-0.91, 0.03)          | 0.06    |                              |         |
| BMI (per increase of 1)                               | -0.02 (-0.06, 0.01)          | 0.21    |                              |         |
| Moderate or severe mitral regurgitation at baseline   | -0.29 (-1.06, 0.48)          | 0.46    |                              |         |
| History of PVD                                        | 0.17 (-0.31, 0.66)           | 0.49    |                              |         |
| History of CVA                                        | -0.25 (-0.97, 0.47)          | 0.49    |                              |         |
| Diabetes (medically-treated)                          | -0.06 (-0.54, 0.41)          | 0.79    |                              |         |
| Immunosuppressive therapy                             | -0.08 (-0.88, 0.72)          | 0.85    |                              |         |
| Mean gradient (MPG) at baseline (per 5 mmHg increase) | 0.01 (-0.08, 0.09)           | 0.89    |                              |         |
| Ejection fraction at baseline (per 5% increase)       | 0.00 (-0.10, 0.11)           | 0.96    |                              |         |

Afib=atrial fibrillation, BMI=body mass index, COPD=chronic obstructive pulmonary disease, CVA=cerebrovascular accident, Katz ADLs=Katz Index Activities of Daily Living Score, Mini-COG=Mini-Cognitive Assessment for Dementia Score, MPG=mean pressure gradient, NYHA=New York Heart Association, PVD=peripheral vascular disease, STS=Society of Thoracic Surgeons score  
Multivariable model  $R^2 = 0.30$

**Table S5. KCCQ According to Groups Defined by Gait Speed at Baseline and 1 Year.**

|                                                      | <b>Normal/<br/>Normal<br/>(n=150)</b> | <b>Slow/<br/>Normal<br/>(n=114)</b> | <b>Normal/<br/>Slow<br/>(n=59)</b> | <b>Slow/<br/>Slow<br/>(n=253)</b> | <b>Overall<br/>p-value</b> |
|------------------------------------------------------|---------------------------------------|-------------------------------------|------------------------------------|-----------------------------------|----------------------------|
| <b>Baseline</b>                                      |                                       |                                     |                                    |                                   |                            |
| Subjects with KCCQ data                              | 148                                   | 114                                 | 59                                 | 252                               |                            |
| Median overall summary score (25th, 75th percentile) | 59.2<br>(44.6, 78.7)                  | 54.8<br>(42.7, 73.9)                | 47.1<br>(31.6, 62.9)               | 49.1<br>(34.4, 65.7)              | <0.001*                    |
| p-value vs normal/normal*                            | --                                    | 0.16                                | 0.0004                             | <0.0001                           |                            |
| <b>1-year</b>                                        |                                       |                                     |                                    |                                   |                            |
| Subjects with KCCQ data                              | 150                                   | 111                                 | 59                                 | 252                               |                            |
| Median overall summary score (25th, 75th percentile) | 87.2<br>(72.6, 97.0)                  | 85.9<br>(76.6, 96.9)                | 76.0<br>(53.1, 93.2)               | 73.9<br>(56.9, 84.4)              | <0.001†                    |
| p-value vs normal/normal†                            | --                                    | 0.16                                | 0.02                               | <0.001                            |                            |

\*P-value from two-sided from t test or ANOVA

†P-value from ANOCOVA test

**Table S6. Rate of mortality/hospitalization with inability to perform gait speed test.**

| <b>Outcomes from 1 Year through 2 Years Post-Procedure</b> | <b>Stayed unable (N=23)</b> | <b>Became Unable (N=75)</b> | <b>Became Able (N=12)</b> |
|------------------------------------------------------------|-----------------------------|-----------------------------|---------------------------|
| Mortality or Hospitalization                               | 17.4% (4/23)                | 26.7% (20/75)               | 0%                        |
| Mortality                                                  | 8.7% (2/23)                 | 17.3% (13/75)               | 0%                        |
| Hospitalization                                            | 8.7% (2/23)                 | 13.3% (10/75)               | 0%                        |
